# Supplementary material for: Increased Expression of Immature Mannose-Containing Glycoproteins and Sialic Acid in Aged Mouse Brains
Source: MDPI journal article supplement (doi:10.3390/ijms20246118), 2019-12-04
Supplement: s1 [file s1]

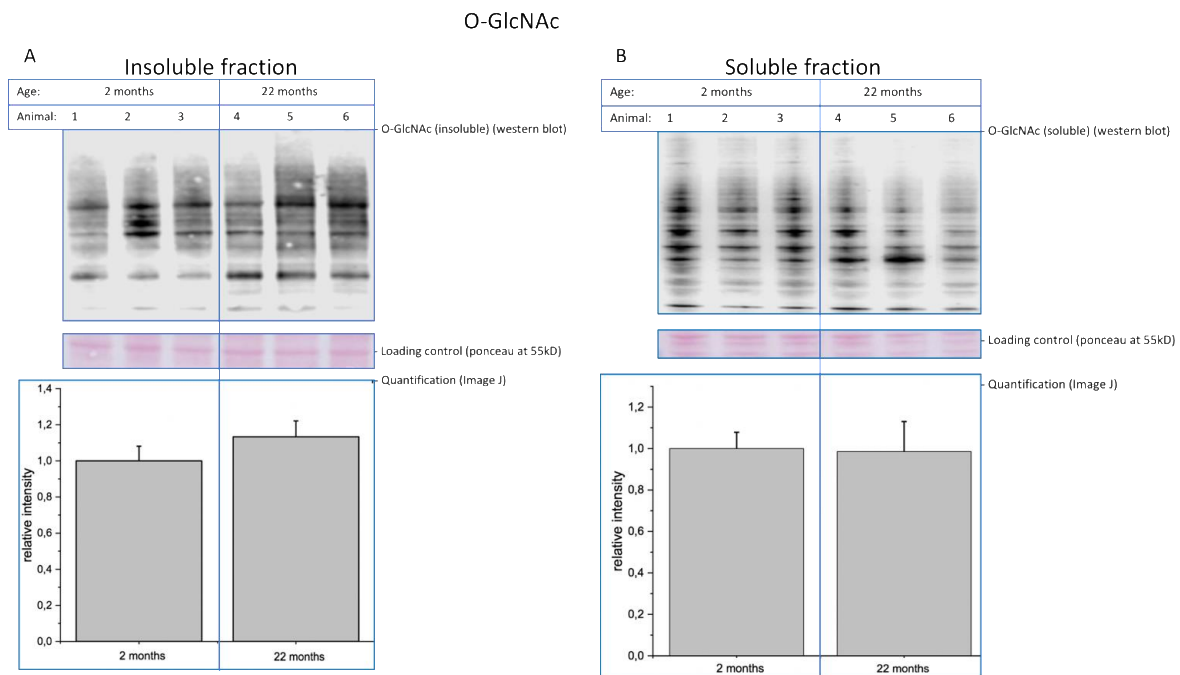

**Supplementary Figure S1.** Brain samples of 2-month-old and 22-month-old mice were separated by centrifugation into an insoluble (A) or soluble (B) fraction. Both fractions were subjected to SDS-PAGE and analyzed by immunoblotting. O-GlcNAc-expression was detected using an O-GlcNAc antibody and quantified in relation to the loading control. Bars represent mean of relative O-GlcNAc expression + SEM of three independent experiments.
